# Supplementary material for: The DNA damage response pathway regulates the expression of the immune checkpoint CD47
Source: PubMed Central journal article supplement (PMC9992352; doi:10.1038/s42003-023-04615-6), 2023-03-07
Supplement: 42003_2023_4615_MOESM2_ESM.pdf [file 42003_2023_4615_MOESM2_ESM.pdf]

SUPPLEMENTARY FIGURES

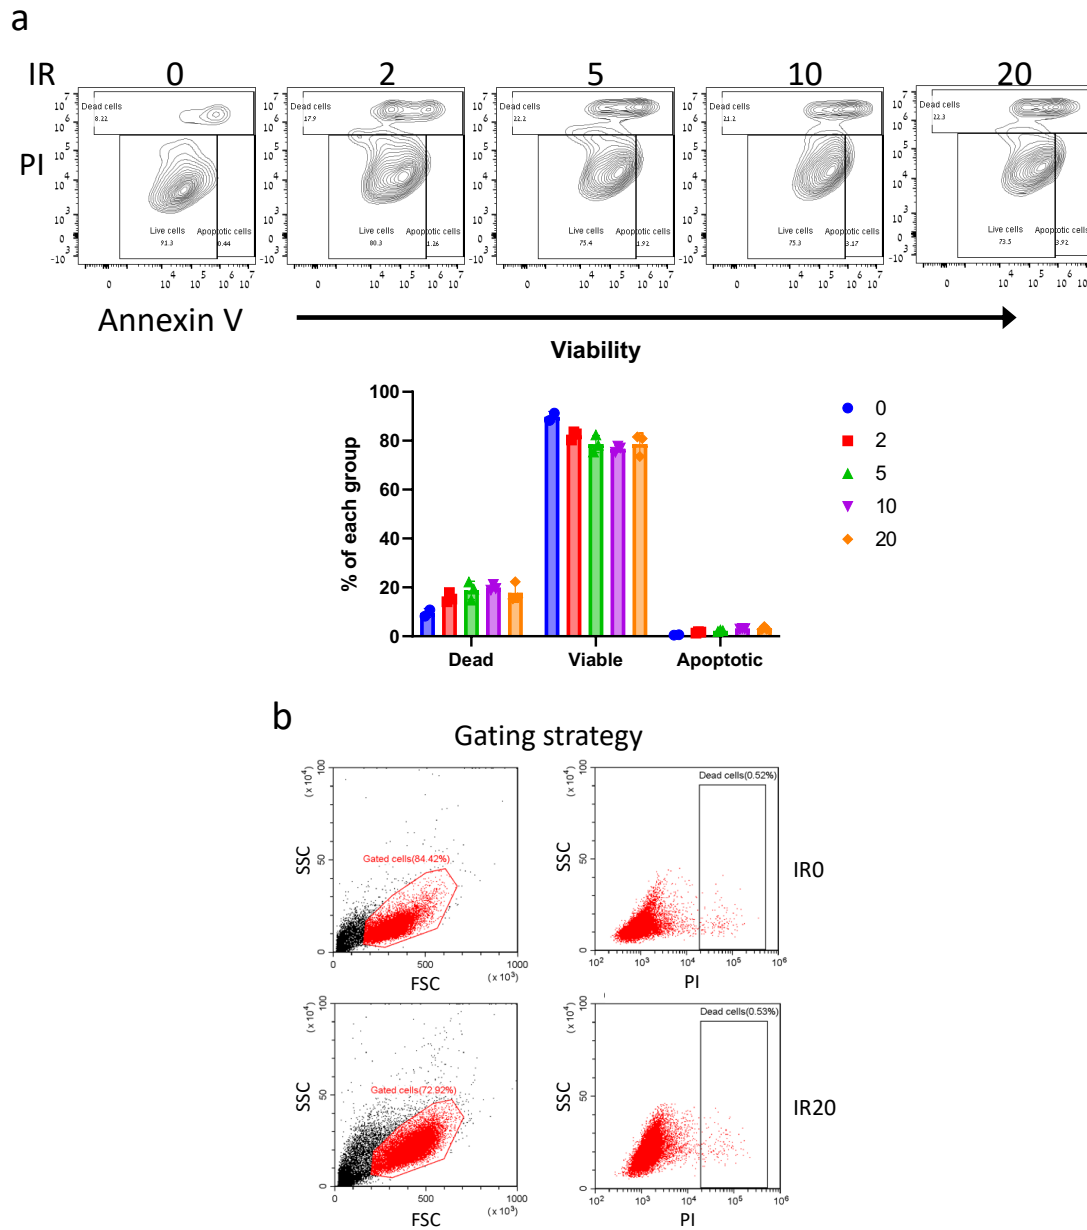

**Figure S1: Cell viability following  $\gamma$ -irradiation**

A. HEK-293T cells were irradiated at the indicated dose and 24h later cells were collected and stained with Annexin V-FITC and propidium iodide (PI). The percentage of dead, live and apoptotic cells are shown in the graph as an average ( $\pm$  STD) of four replicates in each group. A representative experiment of at two independent experiments is shown. B. The FSC/SSC gating strategy of live cells is shown.

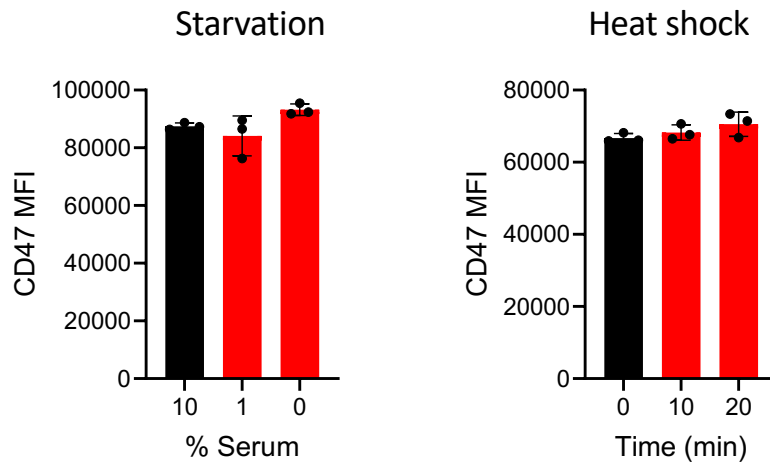

**Figure S2:** Heat shock and serum starvation do not induce CD47 overexpression. HEK-293T cells were incubated in 42°C for 10 and 20 minutes or incubated in medium containing 10, 1 or 0 percent serum for 24h. CD47 expression (MFI) on HEK-293T cells' surface 24h after treatment is presented. Graphs show an average ( $\pm$  STD) of four replicates in each group. A representative experiment of at least four independent experiments is shown. ns: non-significant.

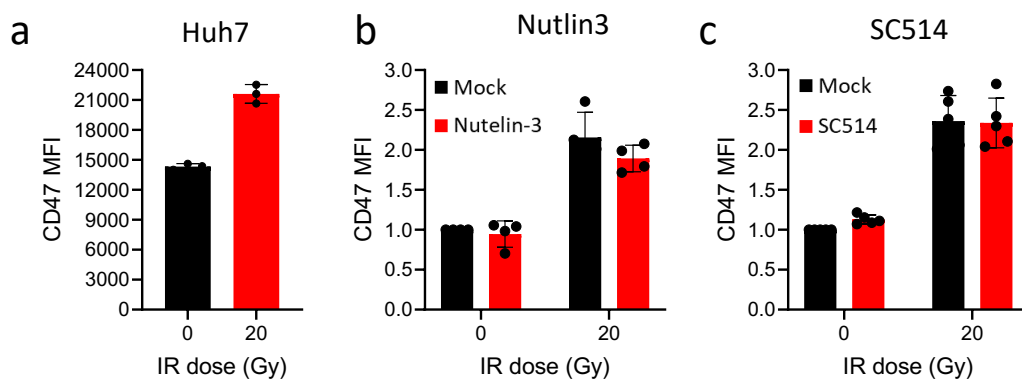

**Figure S3:** Overexpression of CD47 in response to  $\gamma$ -irradiation is not dependent on p53, NF $\kappa$ B pathways

**A.** CD47 expression in Huh7 cells following  $\gamma$ -irradiation. **B-C.** HEK-293T cells were treated with either nutlin-3 (**B**) or SC514 (**C**) and then exposed to  $\gamma$ -irradiation. Graphs depict CD47 expression (MFI). Graph shows an average ( $\pm$  STD) of four independent experiments. ns: non-significant; \*\*  $p < 0.005$ .

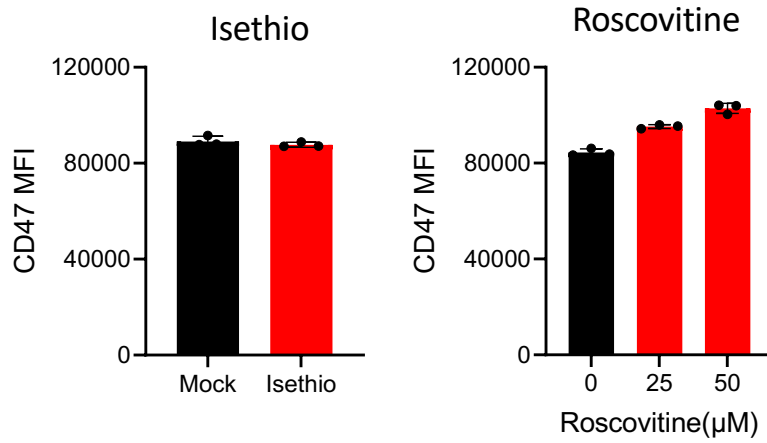

**Figure S4:** *Cell cycle arrest does not induce CD47 overexpression.* HEK-293T cells were incubated with the indicated CDK inhibitors for 24h and CD47 expression was determined. Graphs show an average ( $\pm$  STD) of four replicates in each group. One of at least four independent experiments is shown. ns: non-significant.

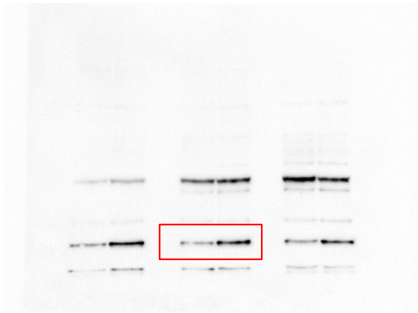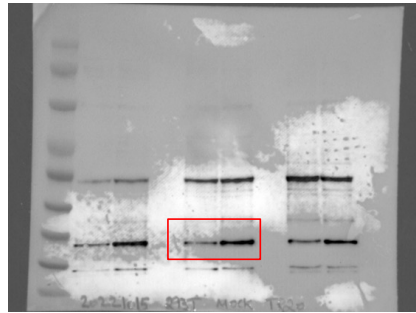

CD47

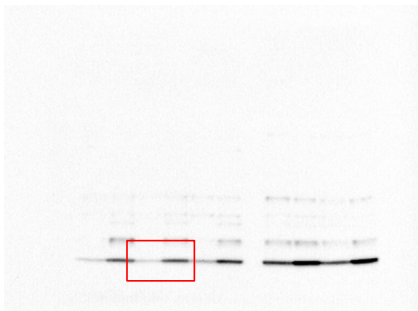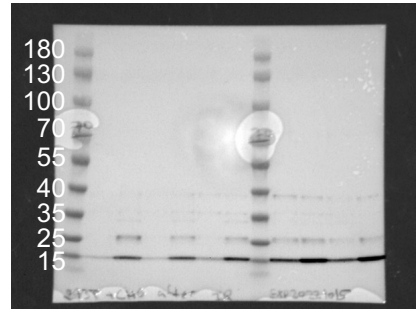

$\gamma$ H2AX

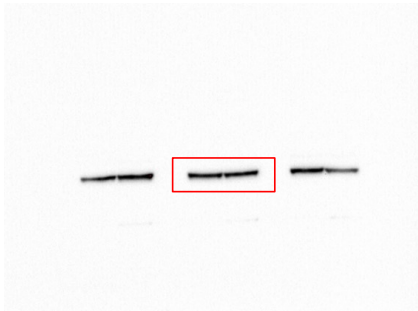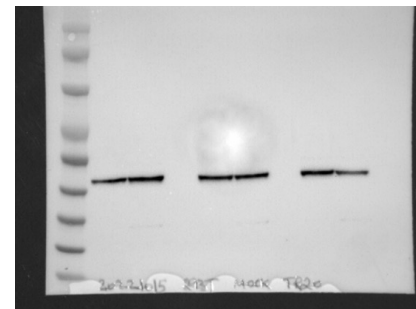

Actin

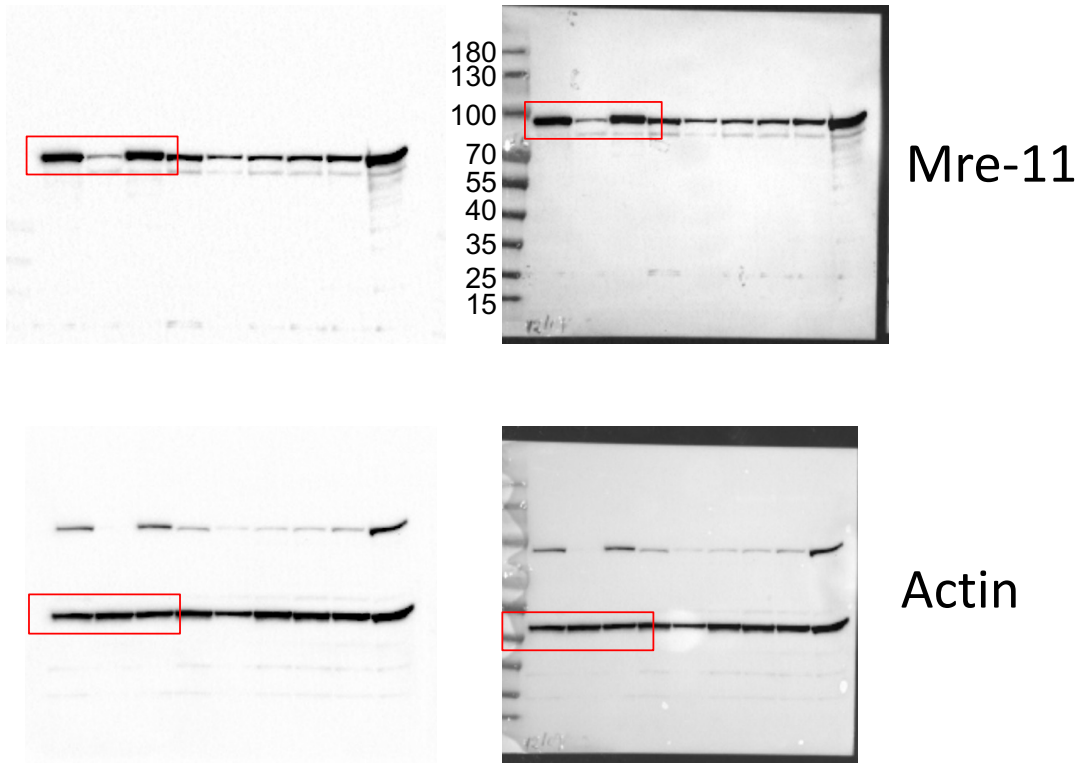

**Figure S5:** *Unprocessed scans of Western Blotting in figures 3 and 4*
