# Supplementary material for: The DNA damage response pathway regulates the expression of the immune checkpoint CD47
Source: PubMed Central journal article supplement (PMC9992352; doi:10.1038/s42003-023-04615-6), 2023-03-07
Supplement: 42003_2023_4615_MOESM3_ESM.pdf [file 42003_2023_4615_MOESM3_ESM.pdf]

## Description of Additional Supplementary Files

**File name:** Supplementary Data 1

**Description:** The source data behind the graphs in the paper.
